# Supplementary material for: Molecular epidemiology and characteristic of virulence gene of community-acquired and hospital-acquired methicillin-resistant Staphylococcus aureus isolates in Sun Yat-sen Memorial hospital, Guangzhou, Southern China
Source: Springer Nature journal article supplement (doi:10.1186/s12879-016-1684-y), 2016-07-22
Supplement: MOESM2 [file 10514376]

**Table S1** The antibiotic resistance of 62 methicillin-resistant *S. aureus* isolates.

| antibiotic | Resistance rate (%) |                   | Overall<br>(n=62) | P-value |
|------------|---------------------|-------------------|-------------------|---------|
|            | CA-MRSA<br>(n=23)   | HA-MRSA<br>(n=39) |                   |         |
| CIP        | 34.8                | 89.7              | 69.4              | <0.001  |
| MFX        | 17.4                | 39.5              | 31.1              | 0.001   |
| E          | 95.7                | 91.9              | 93.3              | 0.373   |
| DA         | 95.7                | 92.3              | 93.5              | 0.373   |
| RD         | 4.3                 | 33.3              | 22.6              | <0.001  |
| CN         | 21.7                | 84.6              | 61.3              | <0.001  |
| SXT        | 34.8                | 41.0              | 38.7              | 0.466   |
| TET        | 65.2                | 79.4              | 74.2              | 0.040   |
| VA         | 0                   | 0                 | 0                 |         |
| TEC        | 0                   | 0                 | 0                 |         |
| LZD        | 0                   | 0                 | 0                 |         |

CIP, ciprofloxacin; MFX, moxifloxacin; E, erythromycin; DA, clindamycin; RD, rifampicin; CN, gentamicin; SXT, trimethoprim/sulfamethoxazole; TET, tetracycline; VA, vancomycin; TEC, teicoplanin; LZD, linezolid; CA-MRSA, community-acquired methicillin-resistant *Staphylococcus aureus*; HA-MRSA, hospital-acquired methicillin-resistant *Staphylococcus aureus*.

**Table S2** The SCC*mec* type distribution of CA-MRSA and HA-MRSA (n, %).

| SCC <i>mec</i> type        | Total<br>(n=62) | CA-MRSA<br>(n=23) | HA-MRSA<br>(n=39) | P-value |
|----------------------------|-----------------|-------------------|-------------------|---------|
| SCC <i>mec</i> I           | 4(6.5)          | 3(13.0)           | 1(2.6)            | 0.061   |
| SCC <i>mec</i> II          | 1(1.6)          | -                 | 1(2.6)            |         |
| SCC <i>mec</i> III         | 48(77.4)        | 14(60.9)          | 34(87.2)          | <0.001  |
| SCC <i>mec</i> IV(a and d) | 8(12.9)         | 6(26.0)           | 2(5.1)            | <0.001  |
| SCC <i>mec</i> V           | 1(1.6)          | -                 | 1(2.6)            |         |
| Total                      | 62(100)         | 23(100)           | 39(100)           |         |

SCC*mec*, staphylococcal cassette chromosome *mec*; -, not detected; CA-MRSA, community-acquired methicillin-resistant *Staphylococcus aureus*; HA-MRSA, hospital-acquired methicillin-resistant *Staphylococcus aureus*.

**Table S3** MLST type distribution of CA-MRSA and HA-MRSA (n, %).

| ST       | Total<br>(n=62) | CA-MRSA<br>(n=23) | HA-MRSA<br>(n=39) | P-value |
|----------|-----------------|-------------------|-------------------|---------|
| ST239    | 41(66.1)        | 10(43.4)          | 31(79.5)          | <0.001  |
| ST59     | 7(11.3)         | 5(21.7)           | 2(5.1)            | 0.003   |
| ST1      | 2(3.2)          | 1(4.3)            | 1(2.6)            | 1.000   |
| ST45     | 1(1.6)          | 1(4.3)            | -                 |         |
| ST950    | 1(1.6)          | 1(4.3)            | -                 |         |
| ST338    | 1(1.6)          | 1(4.3)            | -                 |         |
| ST7      | 1(1.6)          | 1(4.3)            | -                 |         |
| ST10     | 1(1.6)          | 1(4.3)            | -                 |         |
| ST398    | 2(3.2)          | 2(8.6)            | -                 |         |
| ST537    | 1(1.6)          | -                 | 1(2.6)            |         |
| ST5      | 1(1.6)          | -                 | 1(2.6)            |         |
| ST8      | 1(1.6)          | -                 | 1(2.6)            |         |
| ST3703   | 1(1.6)          | -                 | 1(2.6)            |         |
| Non type | 1(1.6)          | -                 | 1(2.6)            |         |

MLST, multilocus sequence typing; ST, sequence type; -, not detected; CA-MRSA, community-acquired methicillin-resistant *Staphylococcus aureus*; HA-MRSA, hospital-acquired methicillin-resistant *Staphylococcus aureus*.

**Table S4** SCCmec type and MLST type distribution of 62 MRSA isolates.

| ST       | SCCmec I<br>(n=4) | SCCmec II<br>(n=1) | SCCmec III<br>(n=46) | SCCmec IVa<br>(n=5) | SCCmec IVd<br>(n=3) | SCCmec V<br>(n=1) |
|----------|-------------------|--------------------|----------------------|---------------------|---------------------|-------------------|
| ST239    | 1(CA)             | 1(HA)              | 8(CA), 30 ( HA)      | -                   | 1(CA)               | -                 |
| ST59     | 1(CA)             | -                  | 1(CA)                | 2 (HA), 2(CA)       | 1(CA)               | -                 |
| ST45     | 1(CA)             | -                  | -                    | -                   | -                   | -                 |
| ST1      | -                 | -                  | 1 (CA), 1( HA)       | -                   | -                   | -                 |
| ST950    | -                 | -                  | 1(CA)                | -                   | -                   | -                 |
| ST338    | -                 | -                  | -                    | -                   | 1(CA)               | -                 |
| ST7      | -                 | -                  | -                    | 1(CA)               | -                   | -                 |
| ST10     | -                 | -                  | 1(CA)                | -                   | -                   | -                 |
| ST398    | -                 | -                  | 2(CA)                | -                   | -                   | -                 |
| ST537    | -                 | -                  | 1(HA)                | -                   | -                   | -                 |
| ST5      | -                 | -                  | -                    | -                   | -                   | 1(HA)             |
| ST8      | 1(HA)             | -                  | -                    | -                   | -                   | -                 |
| New type | -                 | -                  | 2(HA)                | -                   | -                   | -                 |

SCCmec, staphylococcal cassette chromosome mec; MLST, multilocus sequence typing; ST, sequence type; -, not detected.
