# Supplementary material for: Molecular epidemiology and characteristic of virulence gene of community-acquired and hospital-acquired methicillin-resistant Staphylococcus aureus isolates in Sun Yat-sen Memorial hospital, Guangzhou, Southern China
Source: Springer Nature journal article supplement (doi:10.1186/s12879-016-1684-y), 2016-07-22

**A** *sea*

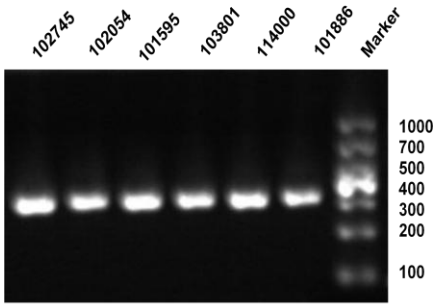

**B** *seb*

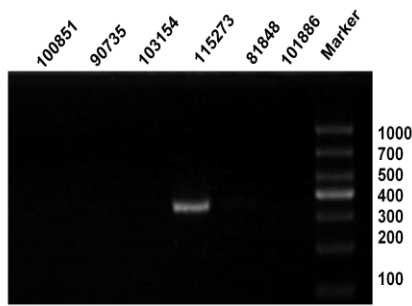

**C** *sec*

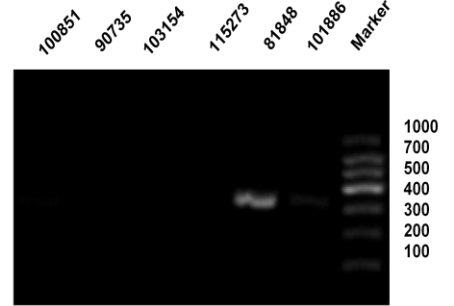

**D** *seg*

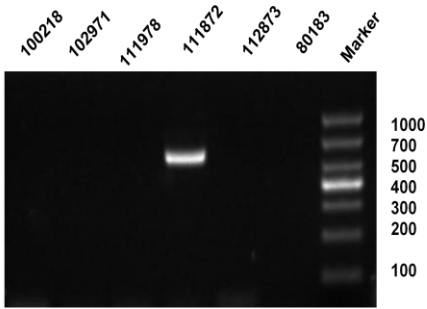

**E** *sei*

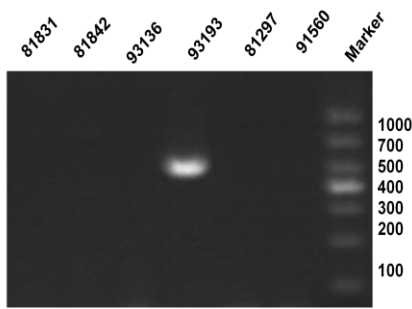

**F** *sen*

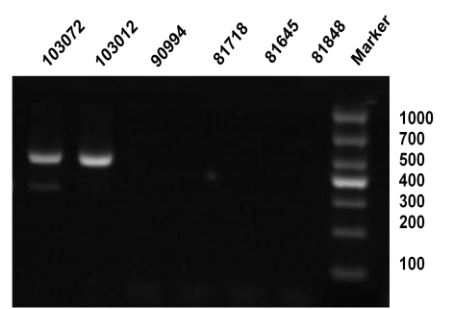

**G** *sem*

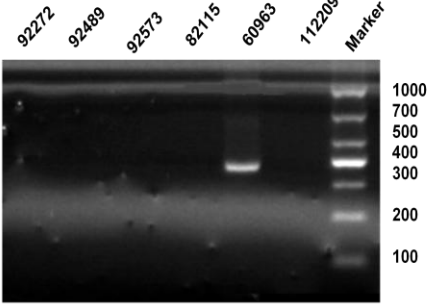

**H** *seo*

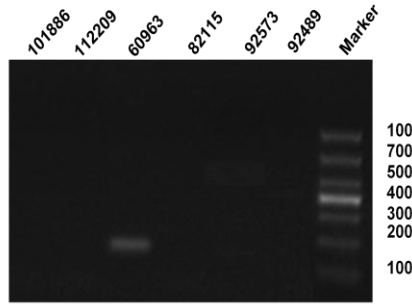

**I** *hla*

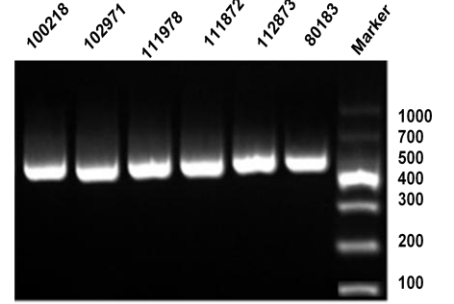

**J** *hlb*

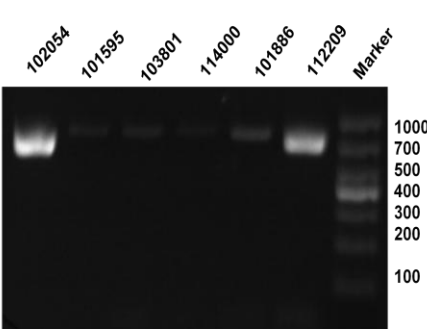

**K** *hlg*

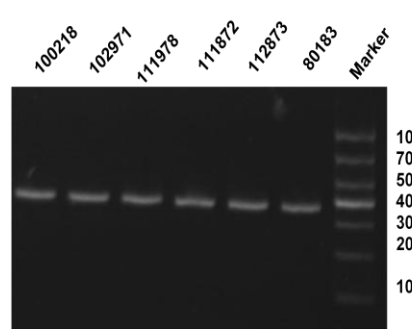

**L** *tsst-1*

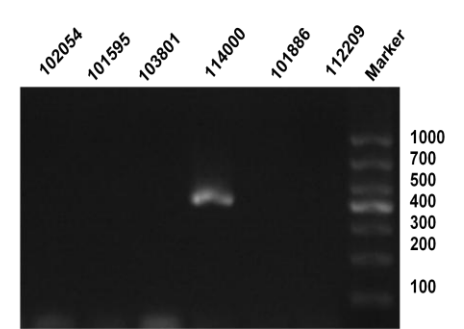

**M** *pvl*

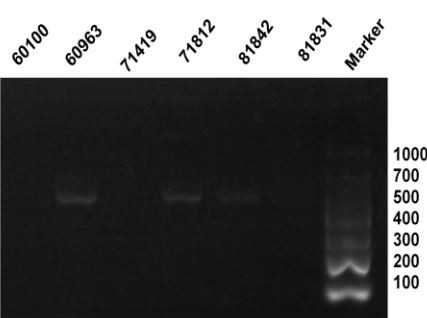

Supplement: MOESM3 [file 10514376]
