# Supplementary material for: Molecular epidemiology and characteristic of virulence gene of community-acquired and hospital-acquired methicillin-resistant Staphylococcus aureus isolates in Sun Yat-sen Memorial hospital, Guangzhou, Southern China
Source: Springer Nature journal article supplement (doi:10.1186/s12879-016-1684-y), 2016-07-22

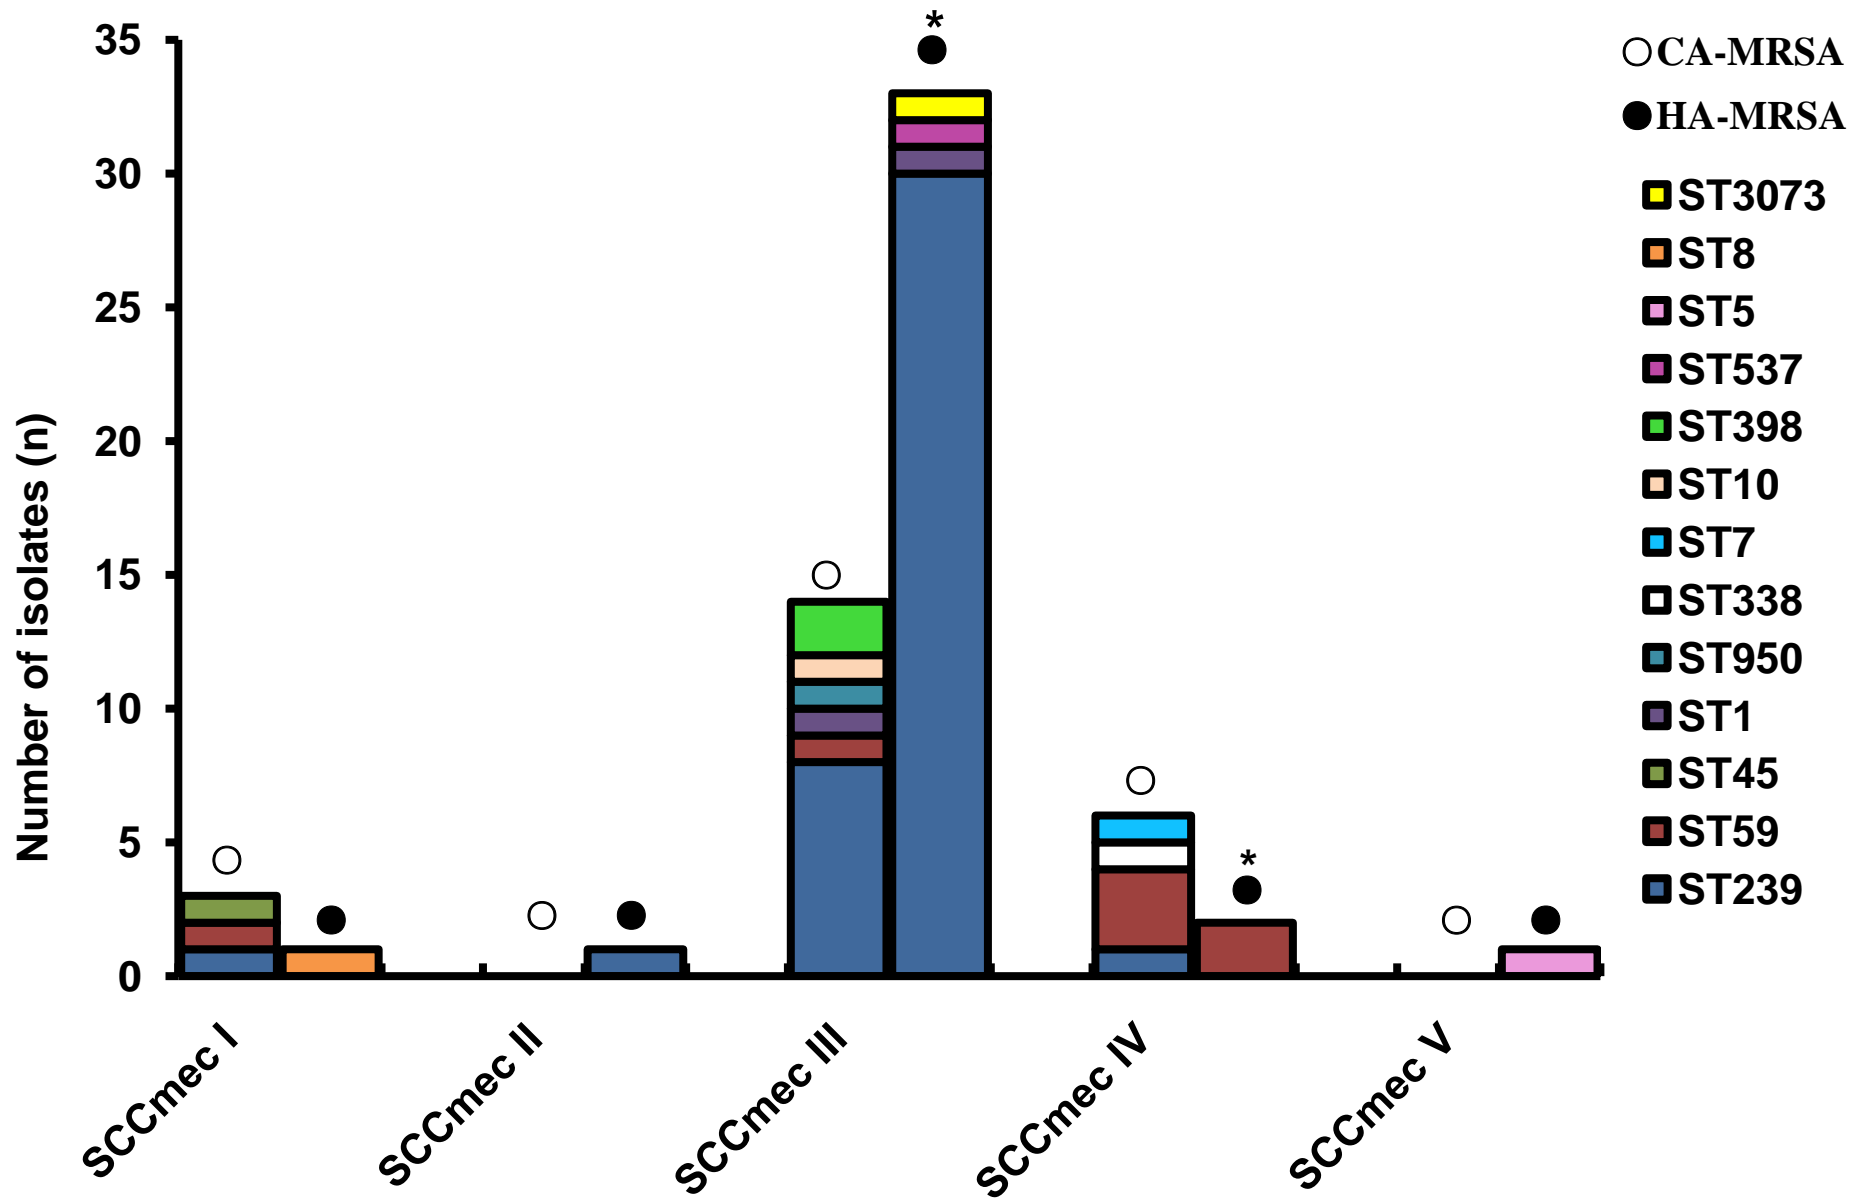

Supplement: MOESM4 [file 10514376]
